# Supplementary material
Source: PubMed Central journal article supplement (PMC9134039)
Supplement: jamapsychiatry-e221256-s001.pdf [file jamapsychiatry-e221256-s001.pdf]

## Supplemental Online Content

Liu RT, Walsh RFL, Sheehan AE, Cheek SM, Sanzari CM. Prevalence and correlates of suicide and nonsuicidal self-injury in children: a systematic review and meta-analysis. *JAMA Psychiatry*. Published online May 25, 2022.  
doi:10.1001/jamapsychiatry.2022.1256

### **eMethods.**

**eTable 1.** Study characteristics

**eTable 2.** Sensitivity analyses of prevalence rates of self-injurious thoughts and behaviors

**eTable 3.** Univariate moderator analyses for Lifetime self-injurious thoughts and behaviors

**eFigure.** Funnel plots for effect sizes in the meta-analyses

This supplemental material has been provided by the authors to give readers additional information about their work.

## **eMethods**

The following search string was applied from inception through December 23, 2021:

("early childhood" or "middle childhood" or "primary school" or "primary schoolers" or "elementary school" or "elementary schoolers" or preschool\* or pre-school\* or prepubertal or pre-pubertal or preadolescent\* or pre-adolescent\* or preadolescence or pre-adolescence or preteen\* or "young children")

AND

(suicid\* or parasuicid\* or self-harm or self-injur\* or "self-mutilation")

NOT

("case study" or "case report" or commentary)

#### Selection of study characteristics for moderator analyses:

Commonly reported sample characteristics that would feasibly allow for moderator analyses were selected. These included mean age of sample, percentage of female participants in the sample, and sample type (community or clinical). SITB measurement characteristics that could reasonably affect prevalence estimates were also selected for moderator analyses. These included measure type (interview versus self-report) and respondent (child, parent, or both).

Although it would have been informative to evaluate the strength of the association between correlates and SITBs as a function of time, this was not possible, as only one study included a prospective longitudinal analysis of relevant constructs.<sup>26</sup> Similarly, given recent increases in preadolescent suicide, especially in certain demographic groups (i.e., Black youth), evaluating temporal trends in SITBs would have been of interest (i.e., by using study date as a moderator). These analyses would need to be stratified by sample type (community versus clinical) to yield meaningfully interpretable data. This consideration alone made such analyses unviable.

**eTable 1. Study characteristics.**

| Study Author(s) (year)                    | N <sup>a</sup> | % Female <sup>a</sup> | Mean Age <sup>a</sup> | Sample Type | Self-Injurious Thoughts and Behaviors Assessment |                         |        |                   |
|-------------------------------------------|----------------|-----------------------|-----------------------|-------------|--------------------------------------------------|-------------------------|--------|-------------------|
|                                           |                |                       |                       |             | Type(s)                                          | Measure(s)              | Format | Time-Frame(s)     |
| Baetens et al. (2013)                     | 1,439          | 54.83                 | 12.00                 | Community   | NSSI                                             | SSM                     | SR     | Lifetime          |
| Bauer et al. (2018)                       | 623            | 38.04                 | 9.19                  | Mixed       | SI                                               | CDI/K-SADS              | SR/I   | 1 Year            |
| Borchardt & Meller (1996)                 | 22             | 27.00                 | 10.20                 | Clinical    | SA                                               | Medical Records         | N/A    | Current           |
| Bridge et al. (2015)                      | 560,940,284    | 48.84                 | —                     | Community   | Suicide Death                                    | Death Records           | N/A    | Lifetime          |
| Cairns et al. (1988)                      | 135            | 15.56                 | —                     | Clinical    | SA                                               | SSM                     | I      | Lifetime          |
| Carlson et al. (1987)                     | 28             | 17.86                 | 9.60                  | Clinical    | SI/SA                                            | Death/Suicide Interview | I      | Lifetime          |
| Causey et al. (1998)                      | 137            | 23.36                 | 3.78                  | Clinical    | NSSI/SI/SA                                       | Medical Records         | N/A    | Current           |
| Chen et al. (in press) <sup>1</sup>       | 715            | 45.60                 | 8.96                  | Community   | SI                                               | BSS                     | SR     | Current           |
| Chiang et al. (2013)                      | 1,589          | 49.09                 | —                     | Community   | SI                                               | SSM                     | SR     | 1 Month           |
| Cowell et al. (2005)                      | 182            | 53.85                 | 10.20                 | At-Risk     | SI                                               | CDI                     | SR     | Current           |
| DeVillie et al. (2020) <sup>2</sup>       | 11,814         | 47.84                 | 9.91                  | Community   | NSSI/SI/SA                                       | K-SADS                  | I      | Lifetime          |
| Greening et al. (2010)                    | 179            | 27.93                 | 9.49                  | Clinical    | SA                                               | SSM                     | I      | Lifetime          |
| Haavisto et al. (2003)                    | 230            | 20.00                 | —                     | Clinical    | SI/SA                                            | SSBS                    | I      | Not Reported      |
| Hunsche et al. (2020)                     | 178            | 17.42                 | —                     | Clinical    | SI                                               | CBCL                    | SR     | 6 Months          |
| Husky et al. (2022) <sup>3</sup>          | 5,183          | 49.68                 | —                     | Community   | SI                                               | DI                      | SR     | Current           |
| James et al. (2021)                       | 353            | 48.40                 | 9.32                  | Community   | SI                                               | K-SADS                  | I      | Lifetime          |
| Kim et al. (2015)                         | 199            | 57.79                 | 11.01                 | At-Risk     | SI                                               | SIQ                     | SR     | Current           |
| Kovess-Masfety et al. (2015) <sup>3</sup> | 7,062          | 49.08                 | 8.73                  | Community   | SI                                               | DI                      | SR     | Current           |
| Larzelere et al. (2004)                   | 73             | —                     | —                     | At-Risk     | SI/SA                                            | CSRA                    | I      | Lifetime          |
| Lawrence et al. (2021) <sup>2</sup>       | 11,875         | 48.85                 | —                     | Community   | SI                                               | K-SADS                  | I      | Current; Lifetime |
| Lee et al. (2020)                         | 22             | 31.82                 | 11.30                 | Clinical    | Suicide Death                                    | School Report           | N/A    | Lifetime          |
| Lewis et al. (1983)                       | 51             | 23.53                 | —                     | Clinical    | SI/SA                                            | Medical Records         | N/A    | Lifetime          |
| Lin et al. (2014)                         | 979            | 49.44                 | 9.60                  | At-Risk     | SI                                               | DSSCA                   | SR     | Current           |
| Livingston & Bracha (1992)                | 90             | 28.89                 | 9.90                  | Clinical    | SI                                               | DICA                    | I      | Not Reported      |
| Lo et al. (2017)                          | 439            | 53.30                 | 10.06                 | Community   | SI                                               | BSS                     | SR     | 1 Week            |
| Luby et al (2019)                         | 314            | 36.00                 | 5.15                  | Mixed       | NSSI/SA                                          | K-SADS                  | I      | 6 Months          |
| Marraccini et al. (2021)                  | 121            | 47.50                 | 10.56                 | Clinical    | SI                                               | Medical Records         | N/A    | Current           |
| Martin et al. (2016)                      | 360            | 27.50                 | 5.23                  | Clinical    | SI/SA                                            | DIPA                    | I      | Lifetime          |
| Milling et al. (1996)                     | 53             | 28.00                 | 9.40                  | Clinical    | SA                                               | DISC                    | I      | Lifetime          |
| Min et al. (2012)                         | 707            | 50.21                 | 6.54                  | Community   | SI                                               | BASC-2                  | SR     | 6 Months          |
| Mishra et al. (2013)                      | 166            | 50.00                 | —                     | Clinical    | Suicide Death                                    | Medical/Death Records   | N/A    | Lifetime          |
| Myers et al. (1985)                       | 205            | —                     | —                     | Clinical    | SA                                               | Medical Records         | N/A    | Current           |
| O’Leary et al. (2006)                     | 131            | 49.00                 | 9.90                  | Mixed       | SI                                               | CDI                     | SR     | Current           |

|                                      |            |       |       |           |               |                        |      |                  |
|--------------------------------------|------------|-------|-------|-----------|---------------|------------------------|------|------------------|
| Ong et al. (2021)                    | 1,464      | 43.31 | —     | Clinical  | SA            | SSM                    | I    | 6 Months         |
| Paul et al. (2017) <sup>4</sup>      | 1,090      | —     | 6.00  | At-Risk   | SI            | CBCL                   | SR   | 6 Months         |
| Paul et al. (2019)                   | 2,886      | 47.47 | 9.00  | At-Risk   | SI            | CBCL                   | SR   | 6 Months         |
| Perepletchikova et al. (2017)        | 43         | 44.19 | 9.23  | Clinical  | NSSI/SI       | C-SSRS                 | I    | Lifetime         |
| Pfeffer et al. (1982)                | 31         | 25.81 | —     | Clinical  | SI            | SSBS                   | I    | 6 Months         |
| Pfeffer et al. (1986)                | 93         | 21.51 | —     | Clinical  | SI/SA         | SSBS                   | I    | 6 Months         |
| Puig-Antich et al. (1989)            | 68         | 51.79 | 9.53  | Clinical  | SA            | K-SADS                 | I    | Lifetime         |
| Read et al. (2020)                   | 222        | 27.03 | 7.80  | Clinical  | SI            | Medical Records        | N/A  | Current          |
| Rosenthal et al. (1984) <sup>5</sup> | 32         | 25.00 | 3.50  | Clinical  | SA            | Medical Records        | N/A  | Current          |
| Rosenthal et al. (1986) <sup>5</sup> | 41         | —     | —     | Clinical  | SA            | SSM                    | I    | Lifetime         |
| Ryan et al. (1987)                   | 95         | 37.89 | 9.60  | Clinical  | SI/SA         | K-SADS                 | I    | Current          |
| Sheftall et al. (2016)               | 87         | 14.94 | —     | Clinical  | Suicide Death | Medical/Death Records  | N/A  | Lifetime         |
| Sheftall et al. (2020) <sup>6</sup>  | 21         | 50.00 | 7.55  | Mixed     | SA            | C-SSRS                 | I    | Lifetime         |
| Sheftall et al. (2021) <sup>6</sup>  | 117        | —     | —     | Mixed     | SI            | C-SSRS                 | I    | Lifetime         |
| Shinsugi et al. (2015)               | 65,076,000 | 48.68 | —     | Community | Suicide Death | Death Records          | N/A  | Lifetime         |
| Sourander et al. (2006)              | 882        | 52.78 | 12.00 | Community | SI            | SSM                    | SR   | 6 Months         |
| Studart-Bottó et al. (2020)          | 10,401     | 41.69 | —     | Clinical  | Suicide Death | Medical Records        | N/A  | Lifetime         |
| Taussig et al. (2014)                | 515        | 48.00 | 9.80  | At-Risk   | SI/SA         | ARBS                   | SR/I | Lifetime         |
| Thompson et al. (2005) <sup>4</sup>  | 1,051      | 52.40 | 8.00  | At-Risk   | SI            | TSCC                   | SR   | 1 Month          |
| Väli et al. (2007)                   | 334,000    | 48.50 | —     | Community | Suicide Death | Death Records          | N/A  | Lifetime         |
| Viñas et al. (2002)                  | 361        | 49.86 | 9.00  | Community | SI            | CDI                    | SR   | Current          |
| Walsh et al. (2020)                  | 89,107     | 50.16 | 11.63 | Community | SI/SA         | SSM                    | SR   | 1 Year, Lifetime |
| Weiner et al. (1986)                 | 106        | 23.58 | 10.70 | Clinical  | SI/SA         | SSBS                   | I    | 6 Months         |
| Williams et al. (2018)               | 40         | —     | —     | Clinical  | NSSI          | Crisis Assessment Tool | N/A  | Current          |
| Zhu et al. (2019) <sup>1</sup>       | 715        | 45.50 | 8.95  | Community | SI            | BSS                    | SR   | Current          |

Note. ARBS = Adolescent Risk Behavior Survey; BASC-2 = Behavior Assessment System for Children: Second Edition; BSS = Beck Scale for Suicide Ideation; CBCL = Child Behavior Checklist; CDI = Children's Depression Inventory; CSRA = Child Suicide Risk Assessment; C-SSRS = Columbia-Suicide Severity Rating Scale; DI = Dominic Interactive; DICA = Diagnostic Interview for Children and Adolescents; DIPA = Diagnostic Infant and Preschool Assessment; DISC = Diagnostic Interview Schedule for Children – Suicidality Scale; DSSCA = Depression Screen Scale for Children and Adolescents; K-SADS = Kiddie Schedule for Affective Disorders and Schizophrenia; SIQ = Suicidal Ideation Questionnaire; SSBS = Spectrum of Suicidal Behavior Scale; SSM = study-specific measure; TSCC = Trauma Symptom Checklist for Children

N/A = not applicable; I = interview; SR = self-report

NSSI = non-suicidal self-injury; SA = suicide attempt, SI = suicidal ideation

<sup>1, 2, 3, 4, 5, 6</sup> Studies with identical superscripts were drawn from same or overlapping samples but presented unique data included in this review.

<sup>a</sup> The sample size, mean age, and percentage female for participants included in relevant analyses, rather than of the entire study sample, are presented and were incorporated in moderator analyses whenever available. For ease of presentation, whenever the sample size, mean age, or percentage female varied across multiple relevant analyses within a study, data for the cumulative number of unique participants across these analyses are presented here, and the sample size used in each analysis was retained in the relevant meta-analysis for purposes of obtaining

weighted effect sizes. For studies with adolescent subsamples included in head-to-head comparisons between preadolescent and adolescent suicide, the sample size, mean age, and percentage female for only preadolescent participants are presented to be consistent with the presentation for all other studies.

**eTable 2. Sensitivity analyses of prevalence rates of self-injurious thoughts and behaviors.**

| Self-Injury Type  | Sample   | Lifetime |     |        |               |
|-------------------|----------|----------|-----|--------|---------------|
|                   |          | <i>k</i> | N   | %      | 95% CI        |
| Suicide Attempts  | Clinical | 8        | 711 | 18.11% | 08.37 – 34.86 |
| Suicidal Ideation | Clinical | 5        | 431 | 38.37% | 16.21 – 66.69 |

Note. CI = confidence interval; *k* = number of unique effects; N = total number of participants included in pooled analyses

**eTable 3. Univariate moderator analyses for Lifetime self-injurious thoughts and behaviors.**

| <b>Self-injury Type</b>   | <b><i>k</i></b> | <b>N</b>    | <b><i>b</i></b> | <b>SE</b> | <b>%</b> | <b>95% CI</b> | <b><i>p</i></b> |
|---------------------------|-----------------|-------------|-----------------|-----------|----------|---------------|-----------------|
| <b>Suicide Deaths</b>     |                 |             |                 |           |          |               |                 |
| Age <sup>a</sup>          | —               | —           | —               | —         | —        | —             | —               |
| % Female                  | 14              | 626,360,685 | -.01            | .02       | —        | —             | .56             |
| Measure Type <sup>b</sup> | —               | —           | —               | —         | —        | —             | —               |
| Respondent <sup>b</sup>   | —               | —           | —               | —         | —        | —             | —               |
| <b>Suicide Attempts</b>   |                 |             |                 |           |          |               |                 |
| Age                       | 11              | 101,581     | -.03            | .11       | —        | —             | .76             |
| % Female                  | 17              | 101,767     | -.02            | .01       | —        | —             | <.01            |
| Measure Type              | 18              | 101,790     | —               | —         | —        | —             | <.01            |
| Interview                 | 16              | 12,683      | —               | —         | 13.85%   | 5.37 – 31.31  | —               |
| Questionnaire             | 2               | 89,107      | —               | —         | 3.39%    | 3.28 – 3.51   | —               |
| Respondent                | 12              | 101,604     | —               | —         | —        | —             | .17             |
| Child                     | 4               | 89,135      | —               | —         | 3.49%    | 3.10 – 3.94   | —               |
| Parent                    | 3               | 436         | —               | —         | 1.97%    | 2.37 – 71.16  | —               |
| Child and Parent          | 5               | 12,033      | —               | —         | 8.24%    | 1.40 – 36.17  | —               |
| <b>Suicidal Ideation</b>  |                 |             |                 |           |          |               |                 |
| Age                       | 9               | 94,260      | -.01            | .06       | —        | —             | .93             |
| % Female                  | 11              | 101,749     | -.02            | .01       | —        | —             | <.001           |
| Measure Type              | 12              | 101,819     | —               | —         | —        | —             | <.01            |
| Interview                 | 10              | 12,780      | —               | —         | 28.18%   | 19.63 – 38.65 | —               |
| Questionnaire             | 2               | 89,039      | —               | —         | 15.56%   | 15.17 – 15.95 | —               |
| Respondent                | 9               | 101,480     | —               | —         | —        | —             | .16             |
| Child                     | 4               | 89,067      | —               | —         | 15.71%   | 14.82 – 16.64 | —               |
| Parent <sup>c</sup>       | —               | —           | —               | —         | —        | —             | —               |
| Child and Parent          | 5               | 12,341      | —               | —         | 22.50%   | 13.52 – 35.02 | —               |

Note. CI = confidence interval; *k* = number of unique effects; N = total number of participants included in pooled analyses. Moderator analyses of Lifetime prevalence of non-suicidal self-injury were not conducted because there was an insufficient number of non-overlapping samples to do so.

<sup>a</sup> None of the studies of suicide death reported mean age.

<sup>b</sup> Moderator analyses of measure type and respondent for Lifetime prevalence of suicide were not applicable, as all data were obtained from death records.

<sup>c</sup> Only one report of Lifetime prevalence of suicidal ideation were based solely on parent response and so was not included in the moderator analysis.



**eFigure. Funnel plots for effect sizes in the meta-analyses. The vertical line indicates the weighted mean effect. Open circles indicate observed effects for actual studies, and closed circles indicate imputed effects for studies believed to be missing due to publication bias. The clear diamond reflects the unadjusted weighted mean effect size, whereas the black diamond reflects the weighted mean effect size after adjusting for publication bias.**

**A. Prevalence of preadolescent suicide deaths**

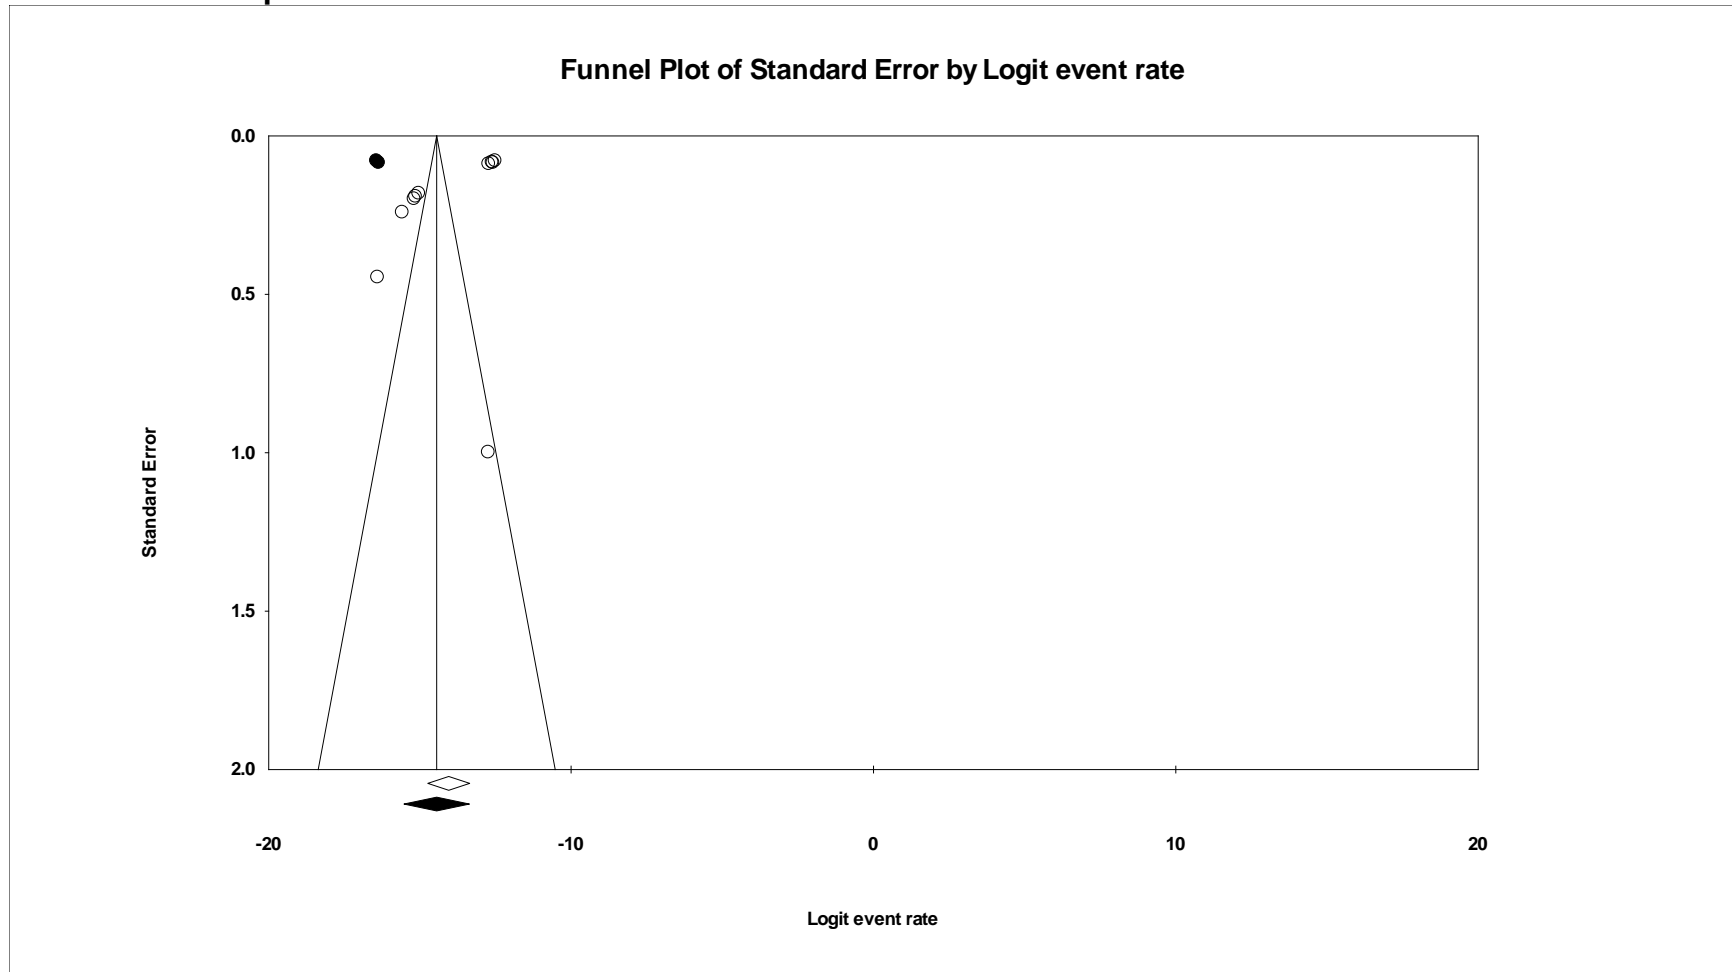

Modest asymmetry was present in the funnel plot and Egger's regression intercept test was statistically significant (2-tailed  $p < .01$ ).

## B. Prevalence of preadolescent suicide attempts

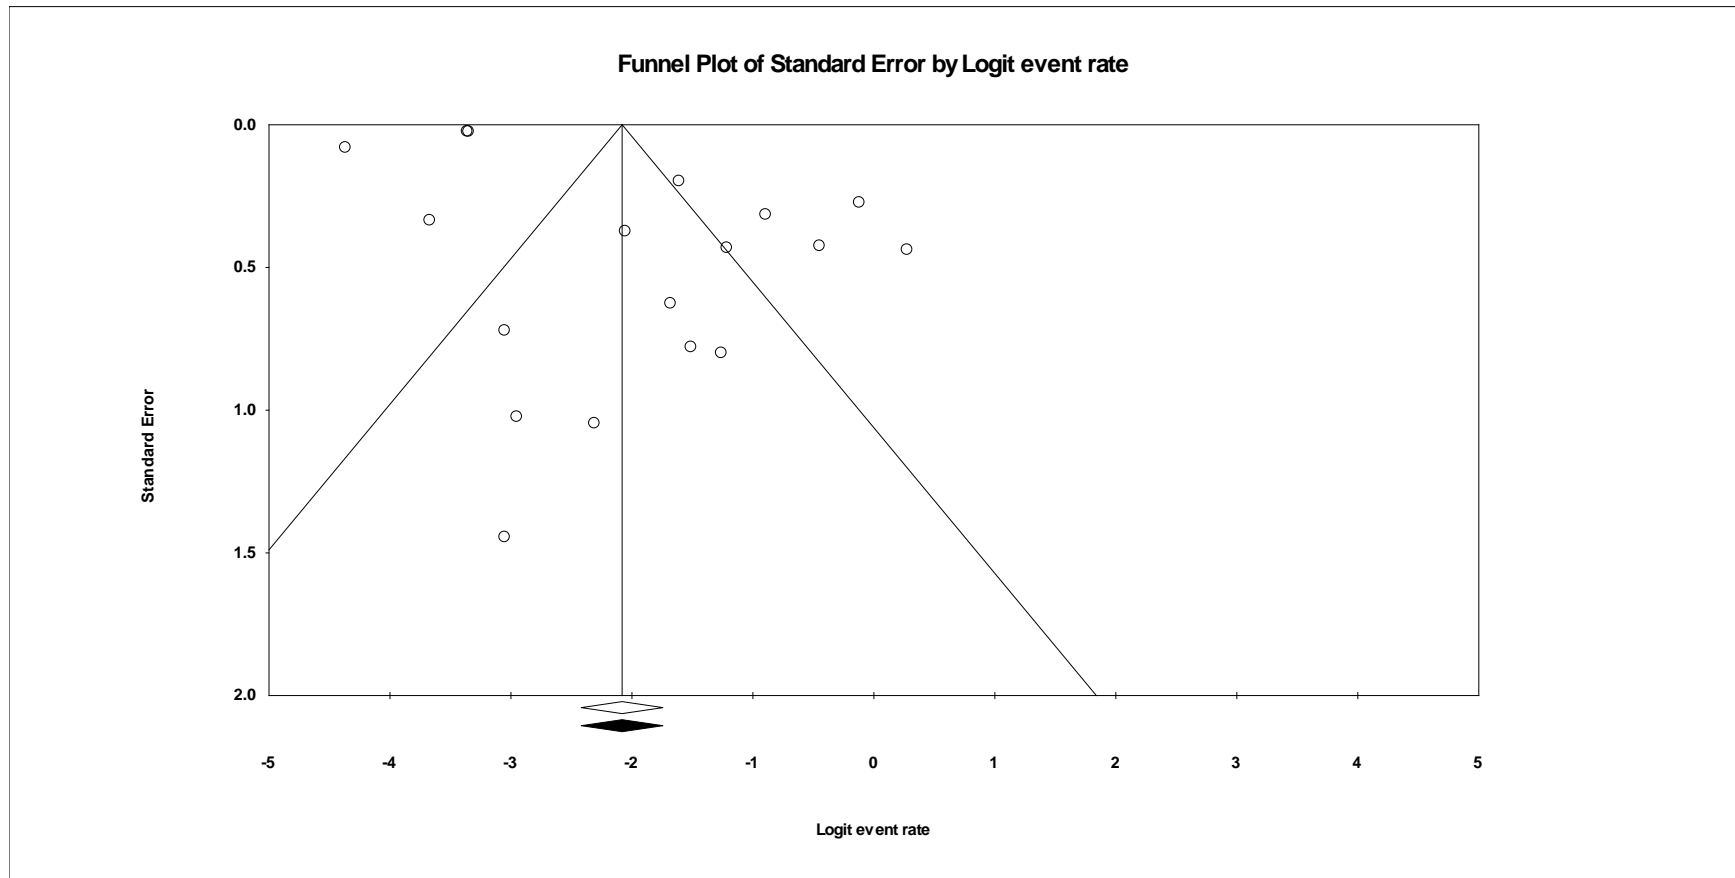

Although asymmetry was not present in the funnel plot, Egger's regression intercept test was statistically significant (2-tailed  $p = .02$ ).

### C. Prevalence of preadolescent suicidal ideation

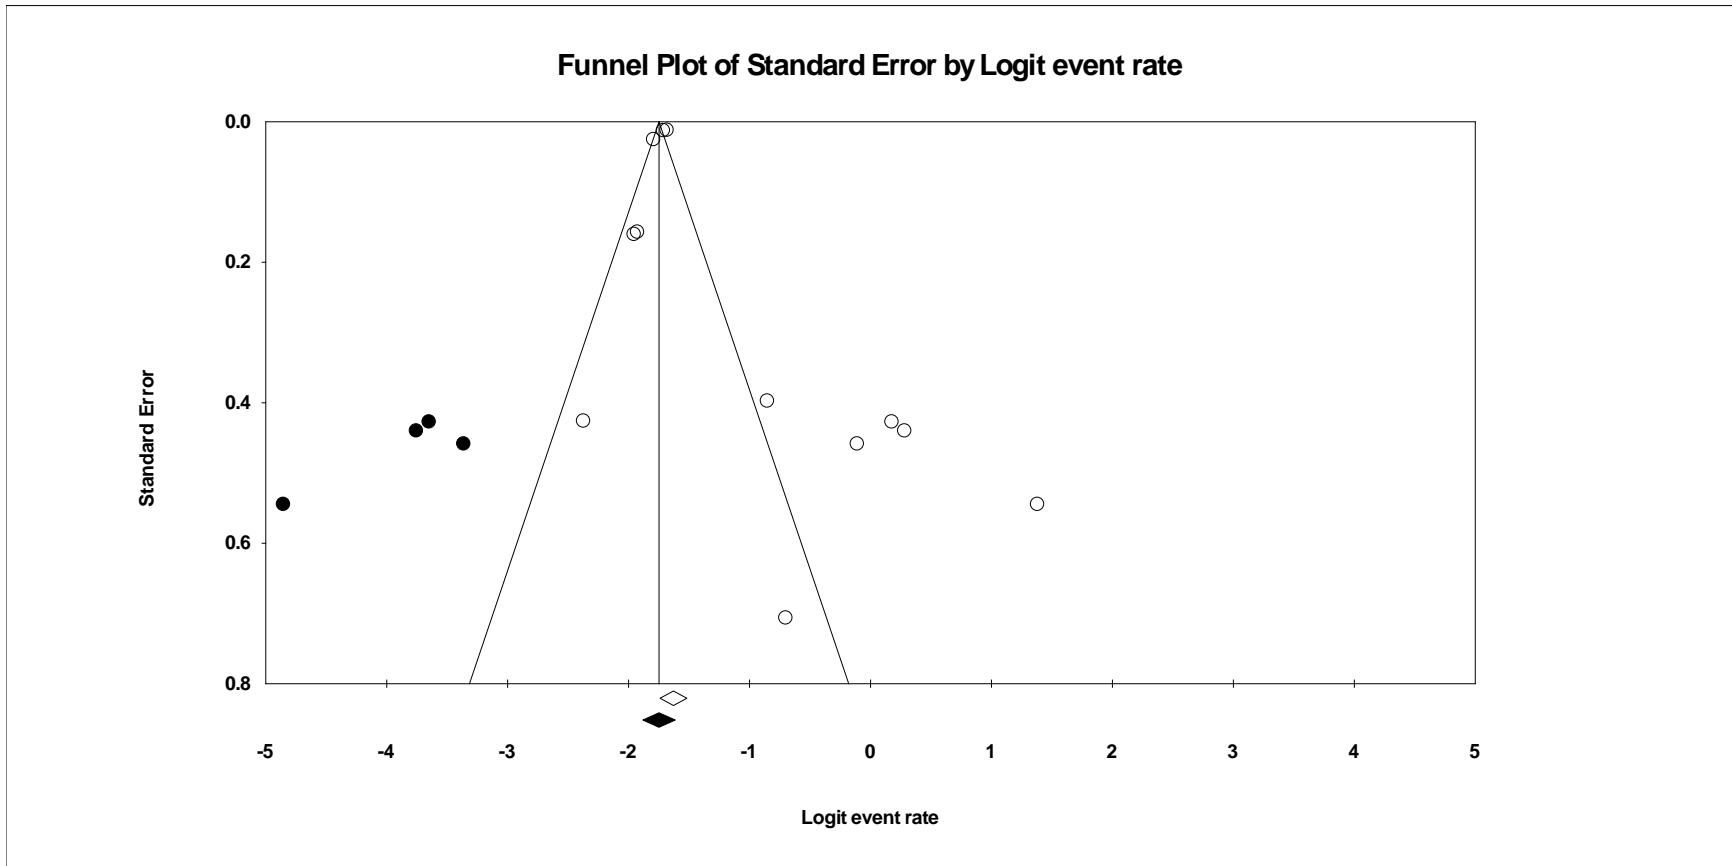

Although asymmetry was present in the funnel plot, Egger's regression intercept test was not statistically significant (2-tailed  $p = .10$ ).
